# Supplementary material for: Hybrid organic–inorganic heterojunction solar cells with 12% efficiency by utilizing flexible film-silicon with a hierarchical surface
Source: Royal Society of Chemistry journal article supplement (doi:10.1039/c3nr06323b), 2014-01-01
Supplement: c3nr06323b.pdf [file c3nr06323b.pdf]

## Supplementary Information

### Hybrid Organic-Inorganic Heterojunction Solar Cells with 12% Efficiency by Utilizing Flexible Film-Silicon with Hierarchical Surface

Subramani Thiyagu<sup>a</sup>, Chen-Chih Hsueh<sup>a</sup>, Chien-Ting Liu<sup>a</sup>, Hong-Jhang Syu<sup>a</sup>, Tzu-Ching Lin<sup>b</sup>, and Ching-Fuh Lin<sup>a, b, c\*</sup>

<sup>a</sup>Graduate Institute of Photonics and Optoelectronics, National Taiwan University, Taipei 10617, Taiwan (R.O.C.)

<sup>b</sup>Graduate Institute of Electronics Engineering, National Taiwan University, Taipei 10617, Taiwan (R.O.C.)

<sup>c</sup>Department of Electrical Engineering, National Taiwan University, Taipei 10617, Taiwan (R.O.C.)

\* Corresponding author. Address: Institute of Photonics and Optoelectronics, National Taiwan University, Taipei, 10617 Taiwan, Republic of China.; Tel: +886-2-33663540; Fax: +886-2-23642603; E-mail address: cflin@cc.ee.ntu.edu.tw

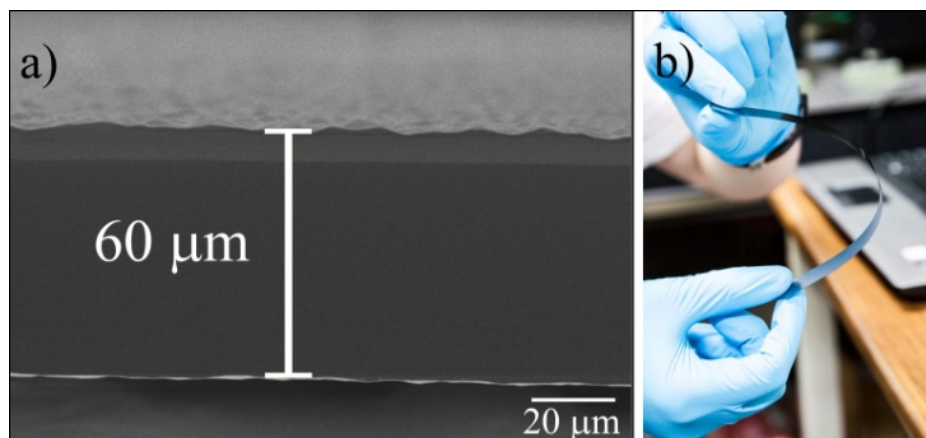

**Fig. S1.** (a) SEM image of etched thin Si wafer which have a thickness of 60 $\mu\text{m}$  (b) The bending flexibility is demonstrated by hands.
